# Supplementary material for: Smoking prevalence among tuberculosis patients: A crosssectional study in Bangladesh and Pakistan
Source: PubMed Central journal article supplement (PMC7485439; doi:10.18332/tid/125452), 2020-08-26
Supplement: TID-18-70-S1.pdf [file TID-18-70-S1.pdf]

Supplementary Table S1: Sample characteristics of those who took part in the subsequent randomised controlled trial.

| Characteristic                                            | Overall<br>(N=2472) |
|-----------------------------------------------------------|---------------------|
| Age (years) <sup>a</sup>                                  | 42.5±14.3           |
| Male <sup>b</sup>                                         | 2448 (99)           |
| Body Mass Index (BMI) <sup>a,c</sup>                      | 18.5±3.2            |
| Marital status <sup>b</sup>                               |                     |
| Single                                                    | 318 (13)            |
| Separated                                                 | 8 (0.3)             |
| Married                                                   | 2111 (85)           |
| Divorced                                                  | 4 (0.2)             |
| Widowed                                                   | 31 (1)              |
| TB Score <sup>b,d</sup>                                   |                     |
| Severity Class I                                          | 264 (11)            |
| Severity Class II                                         | 1157 (47)           |
| Severity Class III                                        | 1022 (41)           |
| Severity Class IV                                         | 29 (1)              |
| Forms of tobacco use (combinations possible) <sup>b</sup> |                     |
| Cigarettes                                                | 2301 (93)           |
| Bidi                                                      | 259 (10)            |

|                                                                                                |           |
|------------------------------------------------------------------------------------------------|-----------|
| Hookah                                                                                         | 94 (4)    |
| Electronic cigarettes                                                                          | 3 (0.1)   |
| Smokeless tobacco                                                                              | 170 (7)   |
| Other                                                                                          | 63 (3)    |
| Cigarettes smoked per day <sup>a,c</sup>                                                       | 11.1±8.6  |
| Duration of smoking (years) <sup>a</sup>                                                       | 23.4±14.0 |
| Ever attempted to quit in the past <sup>b</sup>                                                | 654 (26)  |
| Strength of urges to smoke in past 24 hours (0- not at all to 5 - all the time) <sup>a,f</sup> | 2.8±1.1   |
| Tobacco dependence (time to first daily tobacco smoke) <sup>b,g,h</sup>                        |           |
| within 5 minutes                                                                               | 680 (28)  |
| within 5 to 30 minutes                                                                         | 844 (34)  |
| within 31 to 60 minutes                                                                        | 437 (18)  |
| after 60+ minutes                                                                              | 508 (21)  |

a Mean ± SD

b N (%)

c Missing BMI: n=3;

d TB score was based on the presence of TB related signs and symptoms (e.g. chest pain) and being underweight, with a score of 0 to 8, a higher score indicating a greater number of signs and symptoms present

e Missing cigarettes smoked per day: n=175;

f Missing strength of urges to smoke: n=1;

g Tobacco dependence was measured using the second component of the Heaviness to Smoke Index: 'Time to first use of tobacco product after waking'

h Missing tobacco dependence: n=3
